# Supplementary material for: Nativity-Related Disparities in Preeclampsia and Cardiovascular Disease Risk Among a Racially Diverse Cohort of US Women
Source: PubMed Central journal article supplement (PMC8689384; doi:10.1001/jamanetworkopen.2021.39564), 2021-12-20
Supplement: jamanetwopen-e2139564-s001.pdf [file jamanetwopen-e2139564-s001.pdf]

## Supplementary Online Content

Boakye E, Kwapong YA, Obisesan O, et al. Nativity-related disparities in preeclampsia and cardiovascular disease risk among a racially diverse cohort of US women. *JAMA Netw Open*. 2021;4(12):e2139564.  
doi:10.1001/jamanetworkopen.2021.39564

**eFigure.** Flowchart Describing the Selection of the Study Sample From the Boston Birth Cohort (1998-2016)

**eTable 1.** Characteristics of Study Participants Stratified by Race and Ethnicity in the Boston Birth Cohort (1998-2016)

**eTable 2.** Comparison of Maternal Characteristics by Duration of US Residence and Race and Ethnicity in the Boston Birth Cohort (1998-2016)

**eTable 3.** Crude and Adjusted Odds Ratios for Association Between Preeclampsia and Duration of US Residence in the Boston Birth Cohort (1998-2016) Using 15-Year Cutoff

**eTable 4.** Crude and Adjusted Odds Ratios for Association Between Preeclampsia and Maternal Place of Birth Among Nulliparous Women in the Boston Birth Cohort (1998-2016)

**eTable 5.** Crude and Adjusted Odds Ratios for Association Between Preeclampsia and Length of US Residence Among Nulliparous Women in the Boston Birth Cohort (1998-2016)

This supplementary material has been provided by the authors to give readers additional information about their work.

**eFigure.** Flowchart Describing the Selection of the Study Sample From the Boston Birth Cohort (1998-2016)

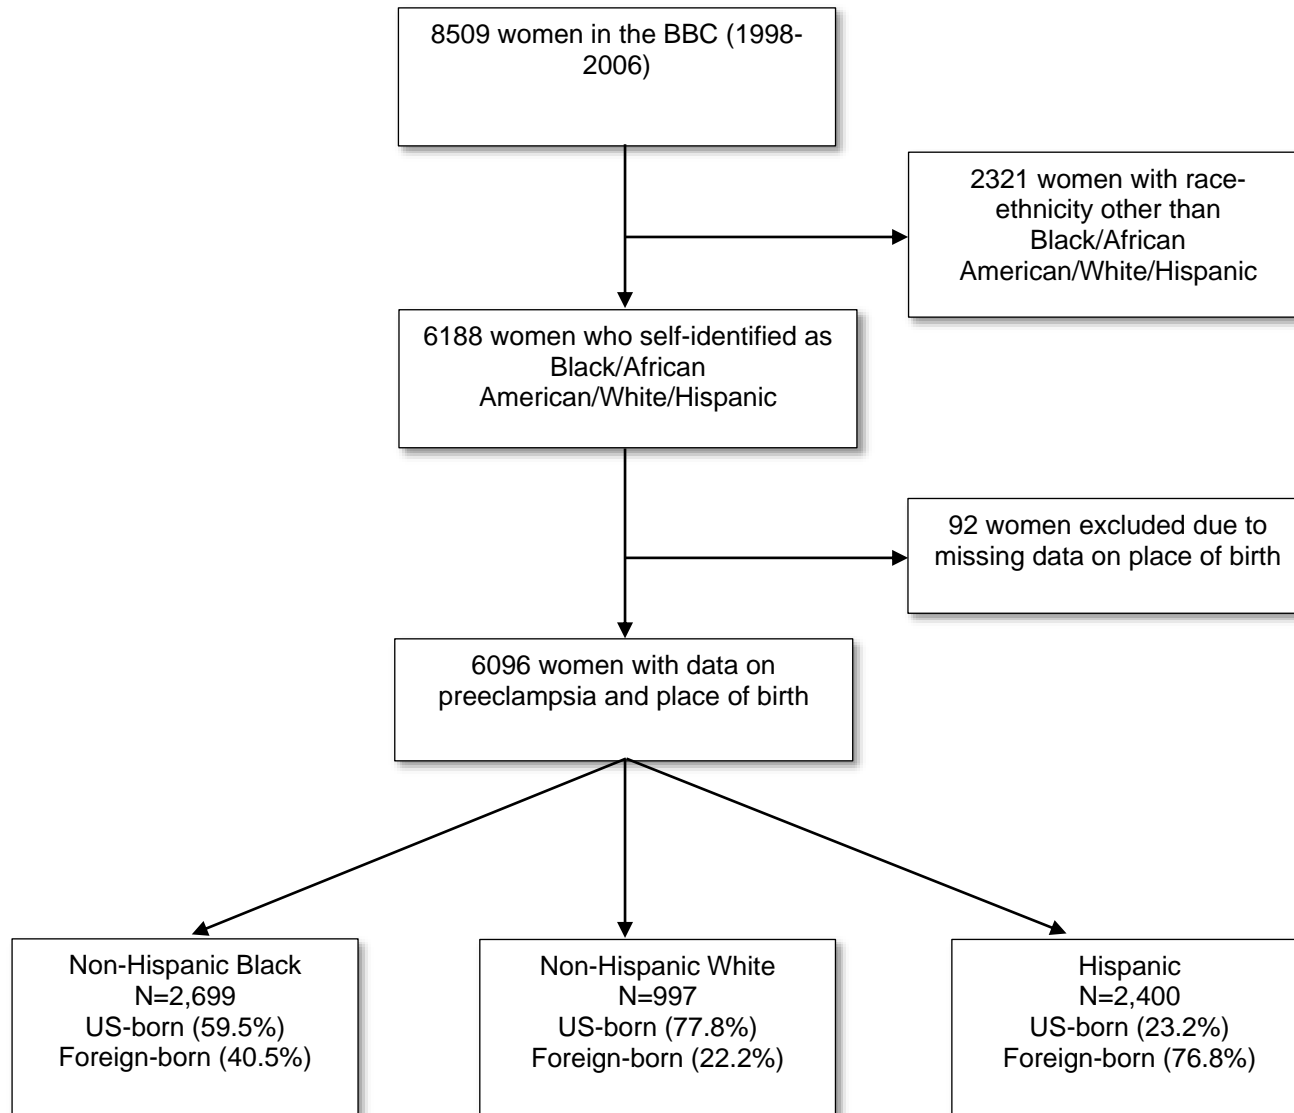

**eTable 1. Characteristics of Study Participants Stratified by Race and Ethnicity in the Boston Birth Cohort (1998-2016)**

| Characteristic                                               | Total<br>N=6096 (%) | Race-Ethnicity                   |                                 |                        |
|--------------------------------------------------------------|---------------------|----------------------------------|---------------------------------|------------------------|
|                                                              |                     | Non-Hispanic Black<br>N=2699 (%) | Non-Hispanic White<br>N=997 (%) | Hispanic<br>N=2400 (%) |
| <b>Maternal Demographics and Obstetrical Characteristics</b> |                     |                                  |                                 |                        |
| Maternal Age, years                                          |                     |                                  |                                 |                        |
| <20                                                          | 747 (12.3)          | 381 (14.1)                       | 61 (6.1)                        | 305 (12.7)             |
| 20-<35                                                       | 4511 (74.0)         | 1924 (71.3)                      | 785 (78.7)                      | 1802 (75.1)            |
| ≥35                                                          | 838 (13.7)          | 394 (14.6)                       | 151 (15.1)                      | 293 (12.2)             |
| Parity                                                       |                     |                                  |                                 |                        |
| 0                                                            | 2620 (43.0)         | 1123 (41.6)                      | 510 (51.1)                      | 987 (41.1)             |
| 1                                                            | 1736 (28.5)         | 765 (28.3)                       | 286 (28.7)                      | 685 (28.6)             |
| 2+                                                           | 1740 (28.5)         | 811 (30.1)                       | 201 (20.2)                      | 728 (30.3)             |
| Preeclampsia                                                 |                     |                                  |                                 |                        |
| No                                                           | 5,516 (90.5)        | 2402 (89.0)                      | 926 (92.9)                      | 2188 (91.2)            |
| Yes                                                          | 580 (9.5)           | 297 (11.0)                       | 71 (7.1)                        | 212 (8.8)              |
| <b>Cardiovascular Disease Risk Factors</b>                   |                     |                                  |                                 |                        |
| Chronic Hypertension                                         |                     |                                  |                                 |                        |
| No                                                           | 5762 (94.5)         | 2482 (92.0)                      | 963 (96.6)                      | 2317 (96.5)            |
| Yes                                                          | 297 (4.9)           | 204 (7.5)                        | 28 (2.8)                        | 65 (2.7)               |
| Missing                                                      | 37 (0.6)            | 13 (0.5)                         | 6 (0.6)                         | 18 (0.8)               |
| Chronic Diabetes                                             |                     |                                  |                                 |                        |
| No                                                           | 5873 (96.4)         | 2589 (95.9)                      | 953 (95.6)                      | 2331 (97.1)            |
| Yes                                                          | 215 (3.5)           | 108 (4.0)                        | 43 (4.3)                        | 64 (2.7)               |
| Missing                                                      | 8 (0.1)             | 2 (0.1)                          | 1 (0.1)                         | 5 (0.2)                |
| Gestational Diabetes                                         |                     |                                  |                                 |                        |
| No                                                           | 5725 (93.9)         | 2539 (94.1)                      | 939 (94.2)                      | 2,247 (93.6)           |
| Yes                                                          | 363 (6.0)           | 158 (5.8)                        | 57 (5.7)                        | 148 (6.2)              |
| Missing                                                      | 8 (0.1)             | 2 (0.1)                          | 1 (0.1)                         | 5 (0.2)                |
| Smoking in Pregnancy                                         |                     |                                  |                                 |                        |
| No                                                           | 5123 (84.1)         | 2299 (85.2)                      | 571 (57.3)                      | 2253 (93.9)            |
| Yes                                                          | 935 (15.3)          | 383 (14.2)                       | 424 (42.5)                      | 128 (5.3)              |
| Missing                                                      | 38 (0.6)            | 17 (0.6)                         | 2 (0.2)                         | 19 (0.8)               |
| Body Mass Index (kg/m <sup>2</sup> )                         |                     |                                  |                                 |                        |
| <25                                                          | 2,912 (47.8)        | 1176 (43.6)                      | 581 (58.3)                      | 1155 (48.1)            |

| Characteristic                          | Total<br>N=6096 (%) | Race-Ethnicity                   |                                 |                        |
|-----------------------------------------|---------------------|----------------------------------|---------------------------------|------------------------|
|                                         |                     | Non-Hispanic Black<br>N=2699 (%) | Non-Hispanic White<br>N=997 (%) | Hispanic<br>N=2400 (%) |
| 25-29.9                                 | 1,603 (26.3)        | 745 (27.6)                       | 232 (23.3)                      | 626 (26.1)             |
| ≥30                                     | 1,190 (19.5)        | 658 (24.4)                       | 152 (15.2)                      | 380 (15.8)             |
| Missing                                 | 391 (6.4)           | 120 (4.4)                        | 32 (3.2)                        | 239 (10.0)             |
| <b>Social and Environmental Factors</b> |                     |                                  |                                 |                        |
| Alcohol use in Pregnancy                |                     |                                  |                                 |                        |
| No                                      | 5283 (86.7)         | 2285 (84.7)                      | 802 (80.4)                      | 2196 (91.5)            |
| Yes                                     | 606 (9.9)           | 294 (10.9)                       | 158 (15.8)                      | 154 (6.4)              |
| Missing                                 | 207 (3.4)           | 120 (4.4)                        | 37 (3.7)                        | 50 (2.1)               |
| General Stress                          |                     |                                  |                                 |                        |
| Mild                                    | 2221 (36.4)         | 847 (31.4)                       | 191 (19.1)                      | 1183 (49.3)            |
| Moderate                                | 3124 (51.3)         | 1478 (54.8)                      | 606 (60.8)                      | 1040 (43.3)            |
| Severe                                  | 702 (11.5)          | 351 (13.0)                       | 190 (19.1)                      | 161 (6.7)              |
| Missing                                 | 49 (0.8)            | 23 (0.8)                         | 10 (1.0)                        | 16 (0.7)               |
| Educational Level                       |                     |                                  |                                 |                        |
| Secondary or less                       | 2089 (34.3)         | 640 (23.7)                       | 183 (18.4)                      | 1266 (52.7)            |
| GED/High School Grad                    | 2013 (33.0)         | 1008 (37.3)                      | 357 (35.8)                      | 648 (27.0)             |
| College education/Grad                  | 1877 (30.8)         | 995 (36.9)                       | 436 (43.7)                      | 446 (18.6)             |
| Missing                                 | 117 (1.9)           | 56 (2.1)                         | 21 (2.1)                        | 40 (1.7)               |
| Marital Status                          |                     |                                  |                                 |                        |
| Married                                 | 1721 (28.2)         | 657 (24.3)                       | 355 (35.6)                      | 709 (29.5)             |
| Single                                  | 4110 (67.4)         | 1944 (72.0)                      | 585 (58.7)                      | 1581 (65.9)            |
| Divorced/Separated/Widowed              | 169 (2.8)           | 58 (2.2)                         | 39 (3.9)                        | 72 (3.0)               |
| Missing                                 | 96 (1.6)            | 40 (1.5)                         | 18 (1.8)                        | 38 (1.6)               |

**eTable 2. Comparison of Maternal Characteristics by Duration of US Residence and Race and Ethnicity in the Boston Birth Cohort (1998-2016)**

| Characteristic                                               | Non-Hispanic Black |                                       |                                       |         | Non-Hispanic White |                                      |                                       |         | Hispanic         |                                       |                                        |         |
|--------------------------------------------------------------|--------------------|---------------------------------------|---------------------------------------|---------|--------------------|--------------------------------------|---------------------------------------|---------|------------------|---------------------------------------|----------------------------------------|---------|
|                                                              | US-born<br>N=1,607 | Foreign-born<br>≥10<br>years<br>N=227 | Foreign-born<br><10<br>years<br>N=539 | p-value | US-born<br>N=776   | Foreign-born<br>≥10<br>years<br>N=32 | Foreign-born<br><10<br>years<br>N=106 | p-value | US-born<br>N=556 | Foreign-born<br>≥10<br>years<br>N=344 | Foreign-born<br><10<br>years<br>N=1302 | p-value |
| <b>Maternal Demographics and Obstetrical Characteristics</b> |                    |                                       |                                       |         |                    |                                      |                                       |         |                  |                                       |                                        |         |
| <b>Maternal Age, years</b>                                   |                    |                                       |                                       | <.001   |                    |                                      |                                       | .15     |                  |                                       |                                        | <.001   |
| <20                                                          | 299<br>(18.6)      | 21 (9.3)                              | 18 (3.3)                              |         | 53<br>(6.8)        | 0 (0.0)                              | 3 (2.8)                               |         | 144<br>(25.9)    | 18 (5.2)                              | 117<br>(9.0)                           |         |
| 20-<35                                                       | 1143<br>(71.1)     | 148<br>(65.2)                         | 408<br>(75.7)                         |         | 608<br>(78.4)      | 24<br>(75.0)                         | 86<br>(81.1)                          |         | 369<br>(66.4)    | 229<br>(66.6)                         | 1051<br>(80.7)                         |         |
| ≥35                                                          | 165<br>(10.3)      | 58<br>(25.6)                          | 113<br>(21.0)                         |         | 115<br>(14.8)      | 8 (25.0)                             | 17<br>(16.1)                          |         | 43<br>(7.7)      | 97<br>(28.2)                          | 134<br>(10.3)                          |         |
| <b>Parity</b>                                                |                    |                                       |                                       | .006    |                    |                                      |                                       | .01     |                  |                                       |                                        | <.001   |
| 0                                                            | 687<br>(42.8)      | 79<br>(34.8)                          | 234<br>(43.4)                         |         | 384<br>(49.5)      | 14<br>(43.7)                         | 66<br>(62.3)                          |         | 249<br>(44.8)    | 84<br>(24.4)                          | 580<br>(44.6)                          |         |
| 1                                                            | 429<br>(26.7)      | 69<br>(30.4)                          | 172<br>(31.9)                         |         | 218<br>(28.1)      | 11<br>(34.4)                         | 31<br>(29.3)                          |         | 140<br>(25.2)    | 96<br>(27.9)                          | 388<br>(29.8)                          |         |
| 2+                                                           | 491<br>(30.5)      | 79<br>(34.8)                          | 133<br>(24.7)                         |         | 174<br>(22.4)      | 7 (21.9)                             | 9 (8.5)                               |         | 167<br>(30.0)    | 164<br>(47.7)                         | 334<br>(25.6)                          |         |
| <b>Preeclampsia</b>                                          |                    |                                       |                                       | .03     |                    |                                      |                                       | .79     |                  |                                       |                                        | .32     |
| No                                                           | 1411<br>(87.8)     | 206<br>(90.8)                         | 494<br>(91.7)                         |         | 721<br>(92.9)      | 29<br>(90.6)                         | 97<br>(91.5)                          |         | 512<br>(92.1)    | 307<br>(89.2)                         | 1190<br>(91.4)                         |         |
| Yes                                                          | 196<br>(12.2)      | 21 (9.2)                              | 45 (8.3)                              |         | 55<br>(7.1)        | 3 (9.4)                              | 9 (8.5)                               |         | 44<br>(7.9)      | 37<br>(10.8)                          | 112<br>(8.6)                           |         |
| <b>Cardiovascular Disease Risk Factors</b>                   |                    |                                       |                                       |         |                    |                                      |                                       |         |                  |                                       |                                        |         |
| <b>Chronic Hypertension</b>                                  |                    |                                       |                                       | .71     |                    |                                      |                                       | .54     |                  |                                       |                                        | .24     |
| No                                                           | 1476<br>(91.8)     | 205<br>(90.3)                         | 500<br>(92.8)                         |         | 749<br>(96.5)      | 30<br>(93.8)                         | 104<br>(98.1)                         |         | 538<br>(96.8)    | 326<br>(94.8)                         | 1265<br>(97.1)                         |         |
| Yes                                                          | 125<br>(7.8)       | 22 (9.7)                              | 38 (7.1)                              |         | 23<br>(3.0)        | 2 (6.2)                              | 2 (1.9)                               |         | 14<br>(2.5)      | 15 (4.3)                              | 31 (2.4)                               |         |
| Missing                                                      | 6 (0.4)            | 0 (0.0)                               | 1 (0.2)                               |         | 4<br>(0.5)         | 0 (0.0)                              | 0 (0.0)                               |         | 4<br>(0.7)       | 3 (0.9)                               | 6 (0.5)                                |         |
| <b>Chronic Diabetes</b>                                      |                    |                                       |                                       | .88     |                    |                                      |                                       | .47     |                  |                                       |                                        | .001    |

|                                         |                |               |               |       |               |               |               |       |               |               |                |       |
|-----------------------------------------|----------------|---------------|---------------|-------|---------------|---------------|---------------|-------|---------------|---------------|----------------|-------|
| No                                      | 1538<br>(96.7) | 219<br>(96.5) | 516<br>(95.7) |       | 741<br>(95.5) | 32<br>(100.0) | 101<br>(95.3) |       | 530<br>(95.3) | 328<br>(95.4) | 1280<br>(98.3) |       |
| Yes                                     | 67 (4.2)       | 8 (3.5)       | 23 (4.3)      |       | 35<br>(4.5)   | 0 (0.0)       | 5 (4.7)       |       | 25<br>(4.5)   | 16 (4.7)      | 20 (1.5)       |       |
| Missing                                 | 2 (0.1)        | 0 (0.0)       | 0 (0.0)       |       | 0<br>(0.0)    | 0 (0.0)       | 0 (0.0)       |       | 1<br>(0.2)    | 0 (0.0)       | 2 (0.2)        |       |
| <b>Gestational Diabetes</b>             |                |               |               | .06   |               |               |               | .99   |               |               |                | <.001 |
| No                                      | 1527<br>(95.0) | 213<br>(93.8) | 495<br>(91.8) |       | 731<br>(94.2) | 30<br>(93.8)  | 100<br>(94.3) |       | 519<br>(93.4) | 302<br>(87.8) | 1240<br>(95.2) |       |
| Gestational                             | 78 (4.9)       | 14 (6.2)      | 44 (8.2)      |       | 45<br>(5.8)   | 2 (6.3)       | 6 (5.7)       |       | 36<br>(6.5)   | 42<br>(12.2)  | 60 (4.6)       |       |
| Missing                                 | 2 (0.1)        | 0 (0.0)       | 0 (0.0)       |       | 0<br>(0.0)    | 0 (0.0)       | 0 (0.0)       |       | 1<br>(0.2)    | 0 (0.0)       | 2 (0.2)        |       |
| <b>Smoking in Pregnancy</b>             |                |               |               | <.001 |               |               |               | <.001 |               |               |                | <.001 |
| No                                      | 1270<br>(79.0) | 220<br>(96.9) | 525<br>(97.4) | 1     | 393<br>(50.6) | 23<br>(71.9)  | 99<br>(93.4)  | 1     | 457<br>(82.2) | 331<br>(96.2) | 1286<br>(98.8) |       |
| Yes                                     | 330<br>(20.5)  | 7 (3.1)       | 9 (1.7)       |       | 382<br>(49.2) | 9 (28.1)      | 6 (5.7)       |       | 98<br>(17.6)  | 9 (2.6)       | 5 (0.4)        |       |
| Missing                                 | 7 (0.5)        | 0 (0.0)       | 5 (0.9)       |       | 1<br>(0.1)    | 0 (0.0)       | 1 (0.9)       |       | 1<br>(0.2)    | 4 (1.2)       | 11 (0.8)       |       |
| <b>Body Mass Index</b>                  |                |               |               | <.001 |               |               |               | <.001 |               |               |                | <.001 |
| <25                                     | 694<br>(43.2)  | 103<br>(45.4) | 234<br>(43.4) | 1     | 445<br>(57.4) | 14<br>(43.8)  | 73<br>(68.9)  | 1     | 267<br>(48.0) | 135<br>(39.2) | 672<br>(51.6)  |       |
| 25-29.9                                 | 418<br>(26.0)  | 64<br>(28.2)  | 170<br>(31.5) |       | 180<br>(23.2) | 13<br>(40.6)  | 19<br>(17.9)  |       | 137<br>(24.6) | 103<br>(29.9) | 332<br>(25.5)  |       |
| ≥30                                     | 444<br>(27.6)  | 53<br>(23.4)  | 92<br>(17.1)  |       | 132<br>(17.0) | 5 (15.6)      | 4 (3.8)       |       | 132<br>(23.8) | 78<br>(22.7)  | 141<br>(10.8)  |       |
| Missing                                 | 51 (3.2)       | 7 (3.1)       | 43 (8.0)      |       | 19<br>(2.4)   | 0 (0.0)       | 10 (9.4)      |       | 20<br>(3.6)   | 28 (8.2)      | 157<br>(12.1)  |       |
| <b>Social and Environmental Factors</b> |                |               |               |       |               |               |               |       |               |               |                |       |
| <b>Alcohol use in Pregnancy</b>         |                |               |               | <.001 |               |               |               | .03   |               |               |                | <.001 |
| No                                      | 1337<br>(83.2) | 195<br>(85.9) | 493<br>(91.5) | 1     | 625<br>(80.6) | 23<br>(71.9)  | 96<br>(90.6)  |       | 457<br>(82.2) | 316<br>(91.9) | 1214<br>(93.2) |       |
| Yes                                     | 213<br>(13.3)  | 26<br>(11.5)  | 28 (5.2)      |       | 126<br>(16.2) | 9 (28.1)      | 8 (7.5)       |       | 98<br>(17.6)  | 23 (6.7)      | 64 (4.9)       |       |
| Missing                                 | 57 (3.6)       | 6 (2.6)       | 18 (3.3)      |       | 25<br>(3.2)   | 0 (0.0)       | 2 (1.9)       |       | 1<br>(0.2)    | 5 (1.4)       | 24 (1.9)       |       |
| <b>General Stress</b>                   |                |               |               |       |               |               |               |       |               |               |                |       |

|                                |                |               |               |           |               |              |              |           |               |               |               |            |
|--------------------------------|----------------|---------------|---------------|-----------|---------------|--------------|--------------|-----------|---------------|---------------|---------------|------------|
| Mild                           | 413<br>(25.7)  | 66<br>(29.1)  | 272<br>(50.5) | <.00<br>1 | 111<br>(14.3) | 6 (18.8)     | 49<br>(46.2) | <.00<br>1 | 172<br>(30.9) | 169<br>(49.1) | 757<br>(58.1) | <0.00<br>1 |
| Moderate                       | 950<br>(59.1)  | 129<br>(56.8) | 217<br>(40.3) |           | 494<br>(63.7) | 17<br>(53.1) | 49<br>(46.2) |           | 304<br>(54.7) | 149<br>(43.3) | 485<br>(37.3) |            |
| Severe                         | 231<br>(14.4)  | 27<br>(11.9)  | 47 (8.7)      |           | 164<br>(21.1) | 9 (28.1)     | 6 (5.7)      |           | 76<br>(13.7)  | 25 (7.3)      | 50 (3.8)      |            |
| Missing                        | 13 (0.8)       | 5 (2.2)       | 3 (0.5)       |           | 7<br>(0.9)    | 0 (0.0)      | 2 (1.9)      |           | 4<br>(0.7)    | 1 (0.3)       | 10 (0.8)      |            |
| <b>Educational Level</b>       |                |               |               | <.00<br>1 |               |              |              | .001      |               |               |               | <.001      |
| Secondary or less              | 433<br>(26.9)  | 34<br>(15.0)  | 100<br>(18.6) |           | 155<br>(20.0) | 2 (6.3)      | 7 (6.6)      |           | 255<br>(45.8) | 166<br>(48.3) | 738<br>(56.7) |            |
| GED/High School Grad           | 631<br>(39.3)  | 83<br>(36.6)  | 187<br>(34.7) |           | 279<br>(36.0) | 10<br>(31.2) | 35<br>(33.0) |           | 156<br>(28.1) | 94<br>(27.3)  | 351<br>(27.0) |            |
| College education/Grad         | 510<br>(31.7)  | 110<br>(48.5) | 250<br>(46.4) |           | 323<br>(41.6) | 20<br>(62.5) | 63<br>(59.4) |           | 130<br>(23.4) | 81<br>(23.5)  | 207<br>(15.9) |            |
| Missing                        | 33 (2.1)       | 0 (0.0)       | 2 (0.4)       |           | 19<br>(2.4)   | 0 (0.0)      | 1 (1.0)      |           | 15<br>(2.7)   | 3 (0.9)       | 6 (0.4)       |            |
| <b>Marital Status</b>          |                |               |               | <.00<br>1 |               |              |              | <.00<br>1 |               |               |               | <.001      |
| Married                        | 177<br>(11.0)  | 92<br>(40.5)  | 291<br>(54.0) |           | 218<br>(28.1) | 21<br>(65.6) | 83<br>(78.3) |           | 94<br>(16.9)  | 139<br>(40.4) | 423<br>(32.5) |            |
| Single                         | 1386<br>(86.3) | 126<br>(55.5) | 227<br>(42.1) |           | 516<br>(66.5) | 6 (18.8)     | 20<br>(18.9) |           | 436<br>(78.4) | 183<br>(53.2) | 828<br>(63.6) |            |
| Divorced/Separated/Widow<br>ed | 26 (1.6)       | 6 (2.7)       | 16 (3.0)      |           | 30<br>(3.9)   | 5 (15.6)     | 3 (2.8)      |           | 18<br>(3.2)   | 18 (5.2)      | 30 (2.3)      |            |
| Missing                        | 18 (1.1)       | 3 (1.3)       | 5 (0.9)       |           | 12<br>(1.5)   | 0 (0.0)      | 0 (0.0)      |           | 8<br>(1.5)    | 4 (1.2)       | 21 (1.6)      |            |

**eTable 3. Crude and Adjusted Odds Ratios for Association Between Preeclampsia and Duration of US Residence in the Boston Birth Cohort (1998-2016) Using 15-Year Cutoff**

|                                     | Odds Ratio (95% Confidence Interval) |         |                  |         |                  |         |                  |         |
|-------------------------------------|--------------------------------------|---------|------------------|---------|------------------|---------|------------------|---------|
|                                     | Model 1                              | p-value | Model 2          | p-value | Model 3          | p-value | Model 4          | p-value |
| Non-Hispanic Black                  |                                      |         |                  |         |                  |         |                  |         |
| US-born (n=1607)                    | Ref                                  |         | Ref              |         | Ref              |         | Ref              |         |
| Foreign-born <15 years (n=661)      | 0.61 (0.45-0.85)                     | .003    | 0.58 (0.42-0.81) | .001    | 0.61 (0.43-0.87) | .007    | 0.56 (0.38-0.82) | .003    |
| Foreign-born ≥15 years (n=105)      | 1.11 (0.62-1.98)                     | .73     | 1.02 (0.57-1.84) | .94     | 0.98 (0.54-1.79) | .95     | 1.02 (0.53-1.96) | .95     |
| Non-Hispanic White                  |                                      |         |                  |         |                  |         |                  |         |
| US-born (n=776)                     | Ref                                  |         | Ref              |         | Ref              |         | Ref              |         |
| Foreign-born <15 years (121)        | 1.18 (0.58-2.38)                     | .64     | 1.23 (0.61-2.50) | .56     | 0.93 (0.41-2.09) | .86     | 1.12 (0.47-2.66) | .80     |
| Foreign-born ≥15 years (n=17)       | 1.75 (0.39-7.84)                     | .47     | 1.85 (0.41-8.32) | .42     | 1.75 (0.37-8.24) | .48     | 1.70 (0.32-8.96) | .53     |
| Hispanic                            |                                      |         |                  |         |                  |         |                  |         |
| US-born (n=556)                     | Ref                                  |         | Ref              |         | Ref              |         | Ref              |         |
| Foreign-born <15 years (n=1531)     | 1.12 (0.78-1.59)                     | .54     | 1.07 (0.75-1.55) | .70     | 1.07 (0.73-1.57) | .74     | 1.03 (0.68-1.57) | .89     |
| Foreign-born ≥15 years (n=115)      | 1.75 (0.94-3.26)                     | .08     | 1.37 (0.71-2.62) | .34     | 1.42 (0.73-2.74) | .30     | 1.30 (0.64-2.62) | .47     |
| Model 1: Unadjusted                 |                                      |         |                  |         |                  |         |                  |         |
| Model 2: Age-adjusted (categorical) |                                      |         |                  |         |                  |         |                  |         |



Model 3: Adjusted for age (categorical), education, marital status, and stress

Model 4: Adjusted for age (categorical), education, marital status, stress, chronic hypertension, chronic diabetes, gestational diabetes, parity, smoking, and BMI

**eTable 4. Crude and Adjusted Odds Ratios for Association Between Preeclampsia and Maternal Place of Birth Among Nulliparous Women in the Boston Birth Cohort (1998-2016)**

|                             | Odds Ratio (95% Confidence Interval) |         |                     |         |                  |         |                     |         |
|-----------------------------|--------------------------------------|---------|---------------------|---------|------------------|---------|---------------------|---------|
|                             | Model 1                              | p-value | Model 2             | p-value | Model 3          | p-value | Model 4             | p-value |
| Overall                     |                                      |         |                     |         |                  |         |                     |         |
| Non-Hispanic White (n=510)  | Ref                                  |         | Ref                 |         | Ref              |         | Ref                 |         |
| Non-Hispanic Black (n=1123) | 1.62<br>(1.14-2.32)                  | .008    | 1.70<br>(1.18-2.44) | .004    | 1.73 (1.20-2.50) | .004    | 1.18<br>(0.79-1.75) | .41     |
| Hispanic (n=987)            | 1.21<br>(0.83-1.76)                  | .32     | 1.27<br>(0.87-1.85) | .22     | 1.23 (0.83-1.83) | .30     | 0.99<br>(0.65-1.52) | .97     |
| Non-Hispanic Black          |                                      |         |                     |         |                  |         |                     |         |
| US-born (n=687)             | Ref                                  |         | Ref                 |         | Ref              |         | Ref                 |         |
| Foreign-born (n=436)        | 0.62<br>(0.43-0.91)                  | .013    | 0.58<br>(0.39-0.85) | .005    | 0.53 (0.35-0.82) | .004    | 0.59<br>(0.38-0.92) | .019    |
| Non-Hispanic White          |                                      |         |                     |         |                  |         |                     |         |
| US-born (n=384)             | Ref                                  |         | Ref                 |         | Ref              |         | Ref                 |         |
| Foreign-born (n=126)        | 1.36<br>(0.68-2.69)                  | .38     | 1.40<br>(0.70-2.78) | .34     | 1.21 (0.56-2.64) | .63     | 1.21<br>(0.51-2.85) | .66     |
| Hispanic                    |                                      |         |                     |         |                  |         |                     |         |
| US-born (n=249)             | Ref                                  |         | Ref                 |         | Ref              |         | Ref                 |         |
| Foreign-born (n=738)        | 1.28<br>(0.77-2.13)                  | .33     | 1.21<br>(0.71-2.05) | .48     | 1.13 (0.67-1.96) | .65     | 1.23<br>(0.69-2.19) | .47     |
| Model 1: Unadjusted         |                                      |         |                     |         |                  |         |                     |         |

Model 2: Age-adjusted (categorical)

Model 3: Adjusted for age (categorical), education, marital status, and stress

Model 4: Adjusted for age (categorical), education, marital status, stress, chronic hypertension, chronic diabetes, gestational diabetes, parity, smoking, and BMI

**eTable 5. Crude and Adjusted Odds Ratios for Association Between Preeclampsia and Length of US Residence Among Nulliparous Women in the Boston Birth Cohort (1998-2016)**

|                                | Odds Ratio (95% Confidence Interval) |         |                  |         |                  |         |                   |         |
|--------------------------------|--------------------------------------|---------|------------------|---------|------------------|---------|-------------------|---------|
|                                | Model 1                              | p-value | Model 2          | p-value | Model 3          | p-value | Model 4           | p-value |
| Non-Hispanic Black             |                                      |         |                  |         |                  |         |                   |         |
| US-born (n=687)                | Ref                                  |         | Ref              |         | Ref              |         | Ref               |         |
| Foreign-born <10 years (n=234) | 0.59 (0.36-0.96)                     | .03     | 0.54 (0.32-0.89) | .02     | 0.50 (0.29-0.87) | .01     | 0.51 (0.29-0.92)  | .03     |
| Foreign-born ≥10 years (n=79)  | 0.55 (0.25-1.23)                     | .15     | 0.52 (0.23-1.17) | .12     | 0.53 (0.23-1.24) | .14     | 0.61 (0.25-1.47)  | .27     |
| Non-Hispanic White             |                                      |         |                  |         |                  |         |                   |         |
| US-born (n=384)                | Ref                                  |         | Ref              |         | Ref              |         | Ref               |         |
| Foreign-born <10 years (66)    | 1.86 (0.84-4.13)                     | .13     | 1.95 (0.87-4.35) | .10     | 1.77 (0.68-4.60) | .24     | 2.16 (0.71-6.56)  | .17     |
| Foreign-born ≥10 years (n=14)  | 1.97 (0.42-9.20)                     | .39     | 2.10 (0.44-9.92) | .35     | 1.85 (0.37-9.33) | .46     | 1.93 (0.32-11.60) | .47     |
| Hispanic                       |                                      |         |                  |         |                  |         |                   |         |
| US-born (n=249)                | Ref                                  |         | Ref              |         | Ref              |         | Ref               |         |
| Foreign-born <10 years (n=580) | 1.18 (0.70-2.00)                     | .53     | 1.10 (0.64-1.91) | .72     | 1.00 (0.56-1.77) | .99     | 1.15 (0.62-2.14)  | .65     |
| Foreign-born ≥10 years (n=84)  | 1.47 (0.66-3.26)                     | .35     | 1.30 (0.57-2.96) | .53     | 1.32 (0.58-3.05) | .51     | 1.35 (0.57-3.19)  | .49     |
| Model 1: Unadjusted            |                                      |         |                  |         |                  |         |                   |         |

Model 2: Age-adjusted (categorical)

Model 3: Adjusted for age (categorical), education, marital status, and stress

Model 4: Adjusted for age (categorical), education, marital status, stress, chronic hypertension, chronic diabetes, gestational diabetes, parity, smoking, and BMI
